# Supplementary material for: Characterization of a New Mouse Model for Peripheral T Cell Lymphoma in Humans
Source: PubMed Central journal article supplement (PMC3230627; doi:10.1371/journal.pone.0028546), 2011-12-05
Supplement: pone.0028546.s001.pdf [file pone.0028546.s001.pdf]

**Table S1**

| <b>Marker</b>                     | <b>Expression</b> | <b>mAb</b>   | <b>Manufacturer</b> |
|-----------------------------------|-------------------|--------------|---------------------|
| B220                              | negative          | RA3-6B2      | BD                  |
| CD44                              | low               | IM7          | BD                  |
| CD49b                             | negative          | Dx5          | BD                  |
| CD62L                             | low               | MEL-14       | BD                  |
| CD69                              | negative          | H1.2F3       | BD                  |
| CD122                             | positive          | 5H4          | BD                  |
| CD127                             | low/-             | SB/199       | Biolegend           |
| CD132                             | positive          | TUGm2        | Biolegend           |
| CD152                             | positive          | UC10-4F10-11 | BD                  |
| D <sup>d</sup>                    | positive          | 34-2-12      | BD                  |
| Foxp3                             | negative          | FJK-16s      | eBioscience         |
| I-A <sup>d</sup>                  | negative          | AMS-32.1     | BD                  |
| Killer lectin-like<br>receptor G1 | negative          | 2F1          | BD                  |
